# Supplementary material
Source: PubMed Central journal article supplement (PMC2621003)
Supplement: M800103-MCP200_1.pdf [file M800103-MCP200_1.pdf]

## Supplement S3: MS-Dictionary based database search for short and long peptides

| <i>TotalProbability</i> | IDs(target) | IDs(decoy) | FDR   | New Peptides |
|-------------------------|-------------|------------|-------|--------------|
| 1e-9                    | 651(4486)   | 16(27)     | 0.024 | 71(62)       |
| 1e-10                   | 273(1314)   | 2(2)       | 0.007 | 17(17)       |
| 5e-11                   | 191(885)    | 2(2)       | 0.010 | 10(10)       |
| 2e-11                   | 149(556)    | 0(0)       | 0     | 8(8)         |

Table 1: Similar to Table 3 in the manuscript, for peptides of average length 8 (spectra in the parent mass range of 882 to 978 Da). One of the 149 peptides identified at zero error rate matches a “one-hit-wonder” while others match to proteins confirmed by multiple peptides in *Shewanella*.

| <i>TotalProbability</i> | IDs(target) | IDs(decoy) | FDR | New Peptides |
|-------------------------|-------------|------------|-----|--------------|
| 1e-9                    | 444(4544)   | 0(0)       | 0   | 17(17)       |
| 1e-10                   | 444(4544)   | 0(0)       | 0   | 17(17)       |
| 5e-11                   | 444(4544)   | 0(0)       | 0   | 17(17)       |
| 2e-11                   | 444(4544)   | 0(0)       | 0   | 17(17)       |

Table 2: Similar to Table 3 in the manuscript, for peptides of average length 14 (spectra in the parent mass range of 1447 to 1656 Da). The numbers of identifications are same for all values of *TotalProbability* considered here since for this length, the number of reconstructions exceeds the limit of 100,000 allowed per spectrum. Of the 444 peptides identified, 4 peptides mapped to proteins that did not have any InsPecT identifications.
